# Supplementary material for: Comprehensive characterization of the antibody responses to SARS-CoV-2 Spike protein finds additional vaccine-induced epitopes beyond those for mild infection
Source: eLife. 2022 Jan 24;11:e73490. doi: 10.7554/eLife.73490 (PMC8887901; doi:10.7554/eLife.73490)
Supplement: Supplementary file 1. [file elife-73490-supp1.xlsx]

## Sheet: 1
MODERNA TRIAL COHORT
Participant ID	vaccine dose	age range	Days post first vaccine dose	sample type
M02	250ug	18-55y	119	Serum
			36	Serum
M04	250ug	18-55y	119	Serum
			36	Serum
M05	250ug	18-55y	119	Serum
			36	Serum
M07	250ug	18-55y	119	Serum
			36	Serum
M09	250ug	18-55y	119	Serum
			36	Serum
M11	250ug	18-55y	119	Serum
			36	Serum
M01	250ug	18-55y	119	Serum
			36	Serum
M03	250ug	18-55y	119	Serum
			36	Serum
M06	250ug	18-55y	119	Serum
			36	Serum
M08	250ug	18-55y	119	Serum
			36	Serum
M10	250ug	18-55y	119	Serum
			36	Serum
M12	250ug	18-55y	119	Serum
			36	Serum
M13	250ug	18-55y	119	Serum
			36	Serum
M14	250ug	18-55y	119	Serum
			36	Serum
M15	250ug	18-55y	119	Serum
			36	Serum
M02	250ug	18-55y	119	Serum
			36	Serum
M04	250ug	18-55y	119	Serum
			36	Serum
M05	250ug	18-55y	119	Serum
			36	Serum
M07	250ug	18-55y	119	Serum
			36	Serum
M09	250ug	18-55y	119	Serum
			36	Serum
M11	250ug	18-55y	119	Serum
			36	Serum
M01	250ug	18-55y	119	Serum
			36	Serum
M03	250ug	18-55y	119	Serum
			36	Serum
M06	250ug	18-55y	119	Serum
			36	Serum
M08	250ug	18-55y	119	Serum
			36	Serum
M10	250ug	18-55y	119	Serum
			36	Serum
M12	250ug	18-55y	119	Serum
			36	Serum
M13	250ug	18-55y	119	Serum
			36	Serum
M14	250ug	18-55y	119	Serum
			36	Serum
M15	250ug	18-55y	119	Serum
			36	Serum
M24	100ug	18-55y	119	Serum
			36	Serum
M16	100ug	18-55y	119	Serum
			36	Serum
M25	100ug	56-70y	119	Serum
			36	Serum
M26	100ug	18-55y	119	Serum
			36	Serum
M17	100ug	18-55y	119	Serum
			36	Serum
M27	100ug	56-70y	119	Serum
			36	Serum
M28	100ug	18-55y	119	Serum
			36	Serum
M20	100ug	18-55y	119	Serum
			36	Serum
M29	100ug	56-70y	119	Serum
			36	Serum
M30	100ug	18-55y	119	Serum
			36	Serum
M21	100ug	18-55y	119	Serum
			36	Serum
M31	100ug	56-70y	119	Serum
			36	Serum
M32	100ug	18-55y	119	Serum
			36	Serum
M33	100ug	56-70y	119	Serum
			36	Serum
M18	100ug	18-55y	119	Serum
			36	Serum
M19	100ug	18-55y	119	Serum
			36	Serum
M34	100ug	18-55y	119	Serum
			36	Serum
M35	100ug	56-70y	119	Serum
			36	Serum
M22	100ug	18-55y	119	Serum
			36	Serum
M36	100ug	56-70y	119	Serum
			36	Serum
M37	100ug	56-70y	119	Serum
			36	Serum
M38	100ug	18-55y	119	Serum
			36	Serum
M39	100ug	56-70y	119	Serum
			36	Serum
M23	100ug	18-55y	119	Serum
			36	Serum
M40	100ug	71+y	119	Serum
			36	Serum
M41	100ug	71+y	119	Serum
			36	Serum
M42	100ug	71+y	119	Serum
			36	Serum
M43	100ug	71+y	119	Serum
			36	Serum
M44	100ug	71+y	119	Serum
			36	Serum
M45	100ug	71+y	119	Serum
			36	Serum
M46	100ug	71+y	119	Serum
			36	Serum
M47	100ug	71+y	119	Serum
			36	Serum
M48	100ug	71+y	119	Serum
			36	Serum
M49	100ug	71+y	119	Serum
			36	Serum
HAARVI COHORT
Participant ID	Age	SARS-CoV-2 infection status	Hospitalization?	sample type	Days post symptom onset	Vaccine received	Days post first vaccine dose
12001	31	acute	hospitalized	Plasma	15	N/A	N/A
12104	56	acute	hospitalized	Plasma	15	N/A	N/A
12101	56	acute	hospitalized	Plasma	11	N/A	N/A
12004	76	acute	hospitalized	Plasma	8	N/A	N/A
3C	47	convalescent	non-hospitalized	Plasma	27	N/A	N/A
5C	43	convalescent	non-hospitalized	Plasma	31	N/A	N/A
7C	65	convalescent	non-hospitalized	Plasma	29	N/A	N/A
17C	29	convalescent	non-hospitalized	Plasma	31	N/A	N/A
4C	48	convalescent	non-hospitalized	Plasma	31	N/A	N/A
8C	22	convalescent	non-hospitalized	Plasma	29	N/A	N/A
11C	56	convalescent	non-hospitalized	Plasma	26	N/A	N/A
12C	68	convalescent	non-hospitalized	Plasma	61	N/A	N/A
15C	28	convalescent	non-hospitalized	Plasma	34	N/A	N/A
20C	30	convalescent	non-hospitalized	Plasma	34	N/A	N/A
21C	36	convalescent	non-hospitalized	Plasma	26	N/A	N/A
22C	65	convalescent	non-hospitalized	Plasma	28	N/A	N/A
23C	65	convalescent	non-hospitalized	Plasma	26	N/A	N/A
25C	52	convalescent	non-hospitalized	Plasma	48	N/A	N/A
27C	52	convalescent	non-hospitalized	Plasma	35	N/A	N/A
32C	36	convalescent	non-hospitalized	Plasma	30	N/A	N/A
35C	29	convalescent	non-hospitalized	Plasma	43	N/A	N/A
103C	71	convalescent	non-hospitalized	Plasma	196	N/A	N/A
				Plasma	356	Pfizer BNT162b2	48
10C	31	convalescent	non-hospitalized	Plasma	31	N/A	N/A
				Plasma	189	N/A	N/A
				Plasma	342	Pfizer BNT162b2	38
110C	51	convalescent	non-hospitalized	Plasma	275	N/A	N/A
				Plasma	337	Pfizer BNT162b2	34
118C	39	convalescent	non-hospitalized	Plasma	204	N/A	N/A
				Plasma	308	Moderna mRNA-1273	37
120C	47	convalescent	non-hospitalized	Plasma	264	N/A	N/A
				Plasma	327	Pfizer BNT162b2	38
136C	57	convalescent	non-hospitalized	Plasma	191	N/A	N/A
				Plasma	315	Pfizer BNT162b2	25
146C	44	convalescent	non-hospitalized	Plasma	177	N/A	N/A
				Plasma	366	Moderna mRNA-1273	56
149C	25	convalescent	non-hospitalized	Plasma	264	N/A	N/A
				Plasma	291	Pfizer BNT162b2	27
154C	62	convalescent	non-hospitalized	Plasma	196	N/A	N/A
				Plasma	279	Pfizer BNT162b2	27
161C	58	convalescent	non-hospitalized	Plasma	183	N/A	N/A
				Plasma	289	Pfizer BNT162b2	31
163C	38	convalescent	non-hospitalized	Plasma	193	N/A	N/A
				Plasma	341	Moderna mRNA-1273	37
191C	27	convalescent	non-hospitalized	Plasma	191	N/A	N/A
				Plasma	310	Moderna mRNA-1273	36
194C	53	convalescent	non-hospitalized	Plasma	191	N/A	N/A
				Plasma	296	Pfizer BNT162b2	29
210C	45	convalescent	non-hospitalized	Plasma	247	N/A	N/A
				Plasma	282	Moderna mRNA-1273	34
213C	33	convalescent	non-hospitalized	Plasma	38	N/A	N/A
				Plasma	279	Pfizer BNT162b2	55
217C	41	convalescent	non-hospitalized	Plasma	177	N/A	N/A
				Plasma	303	Pfizer BNT162b2	65
238C	58	convalescent	non-hospitalized	Plasma	125	N/A	N/A
				Plasma	196	Moderna mRNA-1273	33
239C	42	convalescent	non-hospitalized	Plasma	50	N/A	N/A
				Plasma	163	Pfizer BNT162b2	29
242C	36	convalescent	non-hospitalized	Plasma	59	N/A	N/A
				Plasma	123	Moderna mRNA-1273	38
24C	75	convalescent	non-hospitalized	Plasma	309	N/A	N/A
				Plasma	348	Moderna mRNA-1273	38
26C	25	convalescent	non-hospitalized	Plasma	176	N/A	N/A
				Plasma	312	Pfizer BNT162b2	27
6C	63	convalescent	hospitalized	Plasma	33	N/A	N/A
				Plasma	276	N/A	N/A
				Plasma	326	Pfizer BNT162b2	30
79C	39	convalescent	non-hospitalized	Plasma	110	N/A	N/A
				Plasma	314	Pfizer BNT162b2	29
12H	42	naïve	N/A	Plasma	N/A	N/A	N/A
			N/A	Plasma	N/A	Moderna mRNA-1273	39
16H	46	naïve	N/A	Plasma	N/A	N/A	N/A
			N/A	Plasma	N/A	Pfizer BNT162b2	28
20H	33	naïve	N/A	Plasma	N/A	N/A	N/A
			N/A	Plasma	N/A	Moderna mRNA-1273	34
24H	24	naïve	N/A	Plasma	N/A	N/A	N/A
			N/A	Plasma	N/A	Moderna mRNA-1273	31
27H	59	naïve	N/A	Plasma	N/A	N/A	N/A
			N/A	Plasma	N/A	Moderna mRNA-1273	35
35H	60	naïve	N/A	Plasma	N/A	N/A	N/A
			N/A	Plasma	N/A	Pfizer BNT162b2	54
36H	37	naïve	N/A	Plasma	N/A	N/A	N/A
			N/A	Plasma	N/A	Pfizer BNT162b2	31
38H	26	naïve	N/A	Plasma	N/A	N/A	N/A
			N/A	Plasma	N/A	Moderna mRNA-1273	38
3H	25	naïve	N/A	Plasma	N/A	N/A	N/A
			N/A	Plasma	N/A	Pfizer BNT162b2	29
4H	23	naïve	N/A	Plasma	N/A	N/A	N/A
			N/A	Plasma	N/A	Moderna mRNA-1273	30
50H	32	naïve	N/A	Plasma	N/A	N/A	N/A
			N/A	Plasma	N/A	Pfizer BNT162b2	28
53H	38	naïve	N/A	Plasma	N/A	N/A	N/A
			N/A	Plasma	N/A	Pfizer BNT162b2	43
54H	34	naïve	N/A	Plasma	N/A	N/A	N/A
			N/A	Plasma	N/A	Pfizer BNT162b2	28
55H	52	naïve	N/A	Plasma	N/A	N/A	N/A
			N/A	Plasma	N/A	Pfizer BNT162b2	23
56H	46	naïve	N/A	Plasma	N/A	N/A	N/A
			N/A	Plasma	N/A	Moderna mRNA-1273	34
58H	50	naïve	N/A	Plasma	N/A	N/A	N/A
			N/A	Plasma	N/A	Moderna mRNA-1273	34
59H	59	naïve	N/A	Plasma	N/A	N/A	N/A
			N/A	Plasma	N/A	Pfizer BNT162b2	33
65H	28	naïve	N/A	Plasma	N/A	N/A	N/A
			N/A	Plasma	N/A	Pfizer BNT162b2	34
67H	40	naïve	N/A	Plasma	N/A	Pfizer BNT162b2	34
75H	34	naïve	N/A	Plasma	N/A	Moderna mRNA-1273	38
